# Supplementary material for: Interfacial electronic coupling of ultrathin transition-metal hydroxide nanosheets with layered MXenes as a new prototype for platinum-like hydrogen evolution
Source: Royal Society of Chemistry journal article supplement (doi:10.1039/d1ee02538d), 2021-01-01
Supplement: d1ee02538d1.pdf [file d1ee02538d1.pdf]

## Supporting Information

### **Interfacial Electronic Coupling of Ultrathin Transition-Metal Hydroxides Nanosheets with Layered MXene as a New Prototype for Platinum-Like Hydrogen Evolution**

Linlin Li, Deshuang Yu, Peng Li, Hongjiao Huang, Dengyu Xie, Chia-Ching Lin, Feng Hu, Han-Yi Chen, and Shengjie Peng\*

#### **Experimental section**

##### **Synthesis of $Ti_3C_2T_x$ ultrathin nanosheets**

All chemicals and materials were used as received without further purification.  $Ti_3C_2T_x$  MXene was synthesized by selective etching of Al from  $Ti_3AlC_2$  using in situ HF-forming etchant. The etching solution was prepared by adding 2.0 g of lithium fluoride into 30 mL of 9 M hydrochloric acid followed by stirring for 5 min. Then, 2.0 g of  $Ti_3AlC_2$  powder was slowly added into the above solution at 40 °C and stirred for 36 h. After that, the acidic suspension was washed with deionized (DI) water several times and centrifuged at 3500 rpm for 5 min until pH > 6. Finally, the obtained powders were dispersed in 250 mL of DI water and sonicated for 2 h under Ar flow, followed by centrifuging for 1 h at 3500 rpm. The resultant supernatant was decanted and collected. ( $Ti_3C_2T_x$  MXene content  $\approx$  3 mg/mL).

##### **Synthesis of TMHs@MXene**

Typically, 1.164 g of  $Co(NO_3)_2 \cdot 6H_2O$  was dissolved in 25 mL of methanol to form solution A; then 0.6568 g of 2-methylimidazole was dissolved in a 25 mL of mixed solution (10 mL of MXene solution and 15 mL of DI water) to form solution B. Subsequently, the solution B was poured into solution A under the ultrasonic condition. After aged for 1 h at room temperature, the resultant mixture was centrifuged and washed several time with DI water. Finally, the product was collected and freeze-dried, which was denoted as  $Co(OH)_2@MXene$ . For comparison, we performed controlled experiments with different MXene solutions (0 ml, 1 mL, 5 mL, and 25 mL) under other conditions unchanged, and the obtained products were marked as  $Co(OH)_2$ ,  $Co(OH)_2@1MXene$ ,  $Co(OH)_2@5MXene$ , and  $Co(OH)_2@25MXene$ , respectively. Notably, this protocol could be extended to prepare other transition metal hydroxides, such as

Ni(OH)<sub>2</sub>@MXene and FeOOH@MXene, by simply modulation of chemical components in the precursors.

### **Synthesis of NiFe-LDH@NF**

A piece of FeNi foam (NF) (1 × 2.5 cm<sup>2</sup>) was washed with 2 M HCl, deionized water, and ethanol several times to ensure the removal of the surface oxides and organic species. The synthesis of NiFe-LDH@NF used a hydrothermal method. Firstly, the solution was prepared simply by dissolving 0.5 mM Ni(NO<sub>3</sub>)<sub>2</sub> · 6H<sub>2</sub>O, 0.5 mM Fe(NO<sub>3</sub>)<sub>3</sub> · 9H<sub>2</sub>O, and 5 mM CO(NH<sub>2</sub>)<sub>2</sub> in 35 mL of deionized (DI) water with stirring for 15 min. Then, the as-prepared solution with a piece of NF was transferred into a 50 mL Teflon-lined autoclave, and kept at 120 °C for 12 h. After the autoclave cooling down to room temperature, the obtained NiFe-LDH@NF samples were washed with DI water and then dried in vacuum oven at 80 °C overnight.

### **Materials characterization**

The crystal structure and morphology of the as-obtained samples were characterized by field-emission scanning electron microscope (FESEM; Regulus 8100) and X-ray diffraction (Bruker D8 Advance, Cu-K $\alpha$  radiation,  $\lambda = 1.5418 \text{ \AA}$ ). Transmission electron microscope (TEM) and energy-dispersive X-ray spectroscopy (EDX) mapping were obtained on FEI Tecnai G2 F20 electron microscope. The Brunauer-Emmetand-Teller (BET) surface area was performed using the instrument V-Sorb 2008P. X-ray photoelectron spectroscopy (XPS) was carried out on an Escalab 250Xi electron spectrometer (Thermo Fisher Scientific) equipped with mono-chromated Al K $\alpha$ . The electron paramagnetic resonance (EPR) spectra were recorded using a Bruker EPR A300 spectrometer. The extended X-ray absorption fine structure (EXAFS) was measured at Taiwan Photon Source (TPS) beam line, 44A Quick-scanning X-ray absorption spectroscopy (XAS), in National Synchrotron Radiation Research Center (NSRRC), Hsinchu, Taiwan.

### **Electrochemical measurements**

The electrochemical measurements were conducted in a three-electrode system using an electrochemical workstation (Autolab PGSTAT302, Eco Chemie, Netherlands). The working electrode was prepared by mixing the as-obtained catalyst with conductive agent (carbon black) and binder (Polyvinylidene fluoride, PVDF) in a ratio of 7:2:1 to form a homogeneous slurry. Then, the slurry was coated on Nickle Foam (NF) and dried at 80 °C in vacuum for 10 h. The loading mass of catalyst is around 1.0 mg cm<sup>-2</sup>. The graphite rod and Ag/AgCl (Saturated KCl) electrode was served as counter electrode and reference electrode, respectively. And the measured potentials were converted to reversible hydrogen electrode (RHE) using the equation: E (vs. RHE) = E(Ag/AgCl) + 0.059 pH + 0.1979 V and the polarization curves were recorded at a scan rate of 5 mV s<sup>-1</sup> with iR compensation in 1.0 M KOH. Electrochemically active surface areas were collected from Cyclic Voltammetry (CV) curves at non-Faraday area with different scan rates.

The HER stability of the catalysts was evaluated by chronopotentiometry method at a constant current density of  $50 \text{ mA cm}^{-2}$  for 65 h. Overall water splitting tests was carried out in a standard two-electrode system by using  $\text{Co(OH)}_2$ @MXene on NF as cathode and NiFe-LDH@NF as anode. Linear sweep voltammetry was carried out in 1.0 M KOH at  $5 \text{ mV s}^{-1}$  for the polarization curves. Chronopotentiometry was measured under a constant current density of  $10 \text{ mA cm}^{-2}$  for 100 h.

### Computational details

Spin-polarized calculations were performed using the plane-wave pseudopotential method with the Vienna ab-initio Simulation Package (VASP) [1] based on the density functional theory (DFT). The electron-ion interactions were described by The Projector-augmented wave (PAW) pseudopotential[2]. The exchange-correlation interactions were treated by the generalized-gradient approximation (PBE/GGA) scheme[3]. The cut-off energy was set to 400 eV in all the calculations. The convergence thresholds were set as  $1 \times 10^{-6}$  eV/atom and  $1 \times 10^{-8}$  eV/atom in optimization and single point calculations, respectively.

The calculation models were constructed according to the micro-structures of composite catalyst.  $\text{Co(OH)}_2$  (001) ribbon adsorbed on O-terminated  $\text{Ti}_3\text{C}_2$  MXene (001) interface model was constructed to simulate the  $\text{Co(OH)}_2$ /MXene nanohybrids, as shown in Fig. 5(a). A vacuum thickness of 15 Å was set to avoid the interaction between periodic images. Grimme's semiempirical DFT-D scheme was used for dispersion correction between layers[4]. The Monkhorst-Pack grid of  $6 \times 2 \times 1$  and  $8 \times 4 \times 1$  were used to carry out for the intersurface optimization calculations and density of states (DOS) calculations, respectively.

The free energies of adsorbed states were defined as:  $\Delta G = \Delta E + \Delta E_{\text{zpe}} - T\Delta S$ , where  $\Delta E$  is the adsorption energy of adsorbed H from DFT calculation.  $\Delta E_{\text{zpe}}$  and  $\Delta S$  are the difference in zero point energies and entropy during the reaction, respectively. Free energies calculation details can refer the previous reports.

[1] Kresse, G.; Furthmüller, J. *Comput. Mater. Sci.* 1996, 6, 15.

[2] Blöchl, P. E. *Phys. Rev. B* 1994, 50, 17953.

[3] Perdew, J. P.; Yue, W. *Phys. Rev. B* 1986, 33, 8800.

[4] Grimme, S. *J. Comput. Chem.* 2006, 27, 1787.

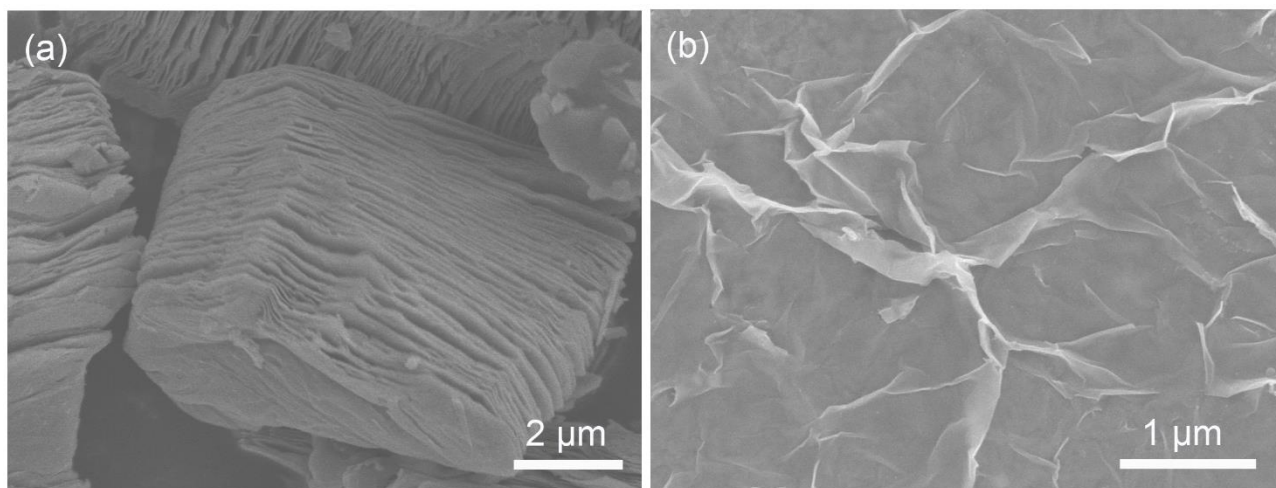

**Fig.S1.** SEM images of (a) an accordion-like  $\text{Ti}_3\text{C}_2\text{T}_x$  MXene and (b) exfoliated ultrathin MXene nanosheets.

Fig.S1b shows the ultrathin MXene nanosheets with typical 2D layered structure, indicating the successful exfoliation of accordion-like  $\text{Ti}_3\text{C}_2\text{T}_x$ .

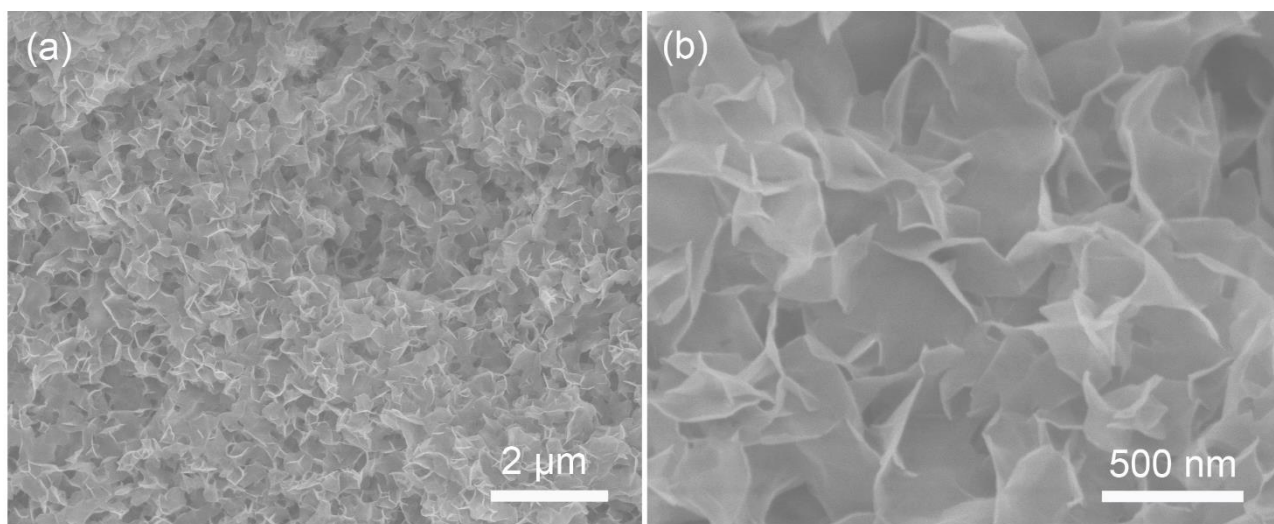

**Fig.S2.** (a and b) SEM images of bare  $\text{Co(OH)}_2$  at different magnifications.

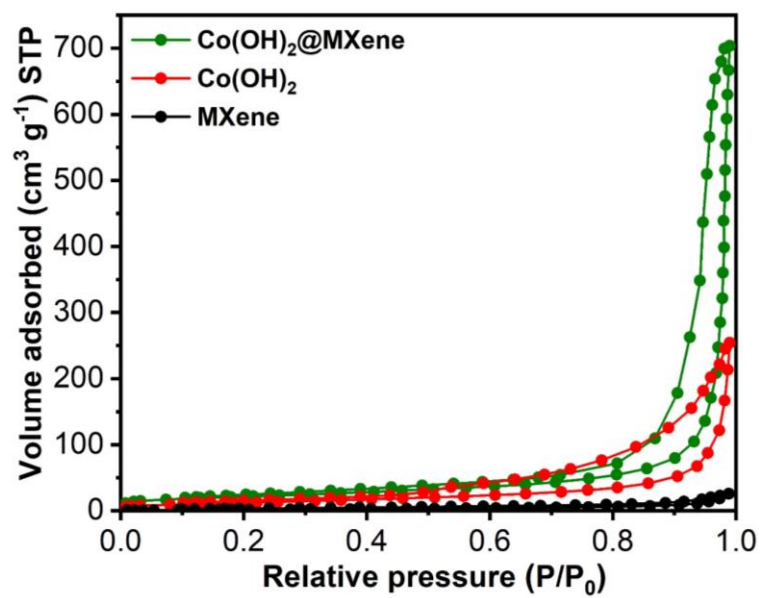

**Fig.S3.** The N<sub>2</sub> adsorption and desorption isotherm of MXene, Co(OH)<sub>2</sub>, and Co(OH)<sub>2</sub>@MXene hybrids.

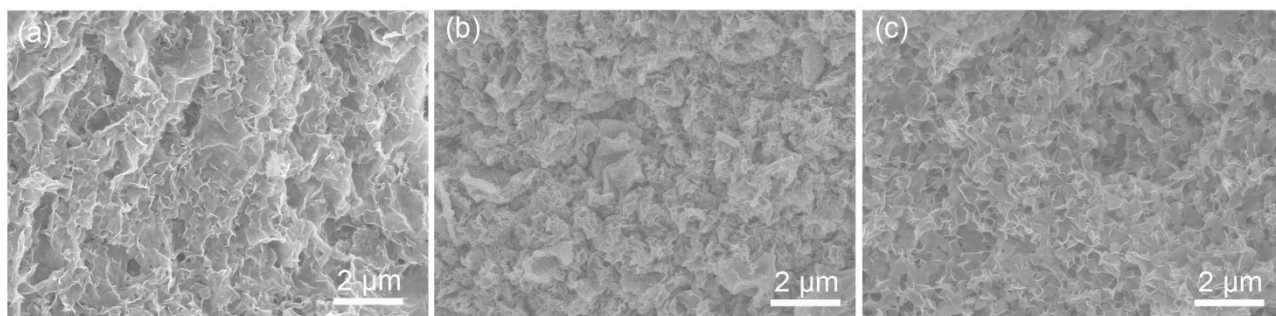

**Fig.S4.** SEM images of  $\text{Co(OH)}_2\text{@MXene}$  with different ratios (a)  $\text{Co(OH)}_2\text{@1MXene}$ , (b)  $\text{Co(OH)}_2\text{@5MXene}$ , and (c)  $\text{Co(OH)}_2\text{@25MXene}$ .

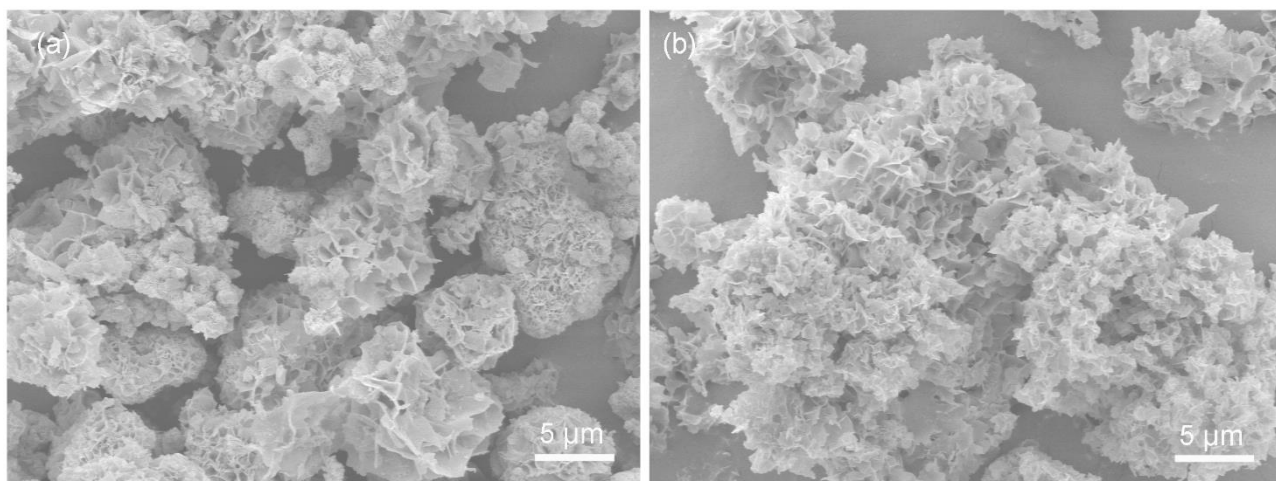

**Fig.S5.** SEM images of (a) Ni(OH)<sub>2</sub> and (b) Ni(OH)<sub>2</sub>@MXene.



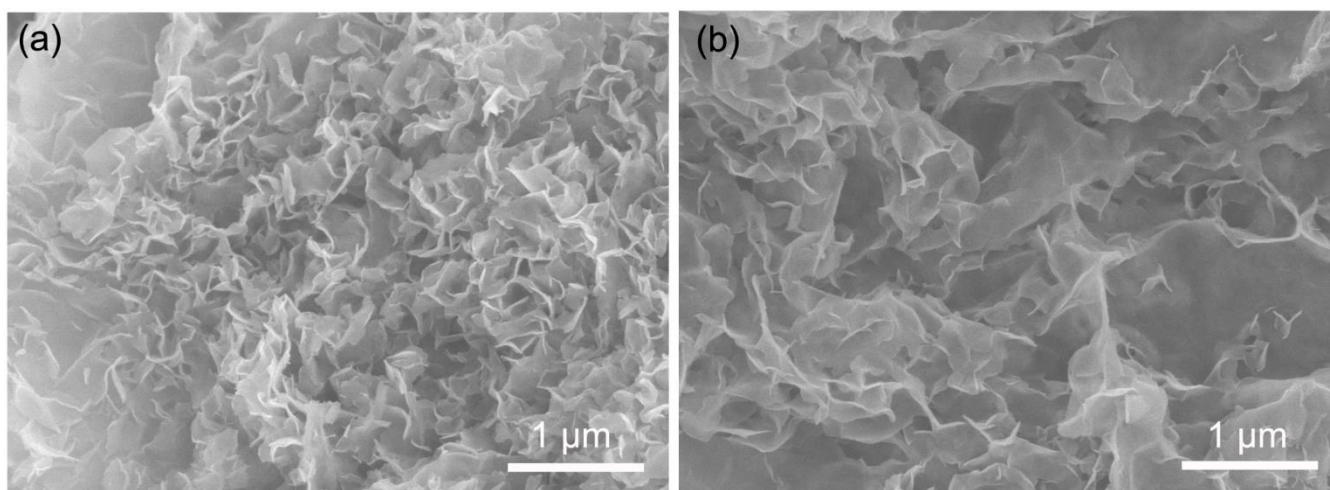

**Fig.S6.** SEM images of (a) FeOOH and (b) FeOOH@MXene.

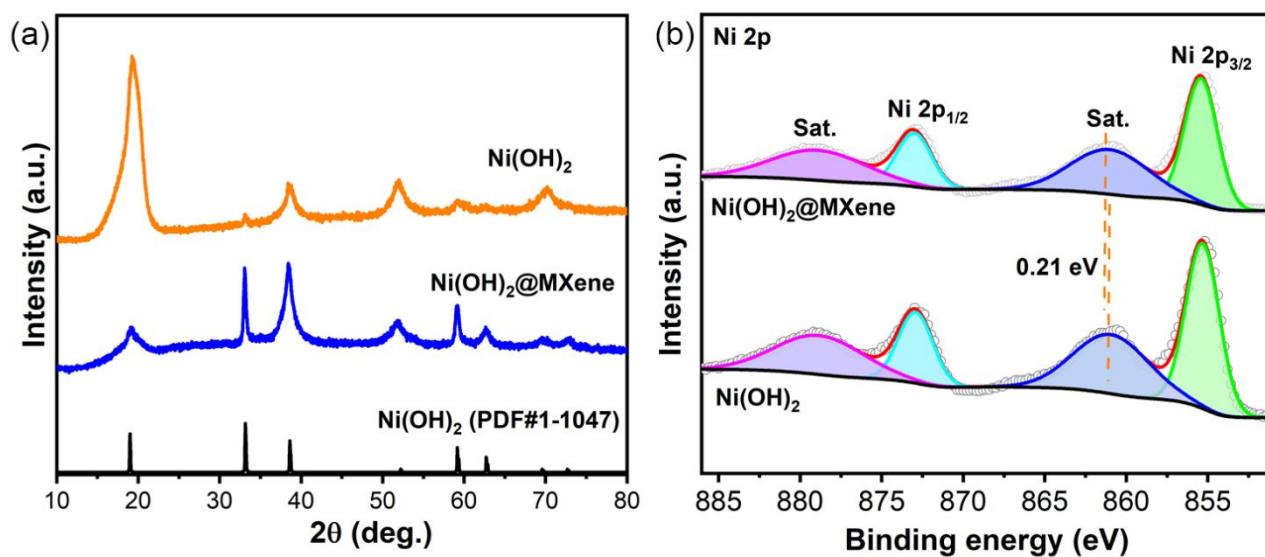

**Fig.S7.** (a) XRD and (b) XPS spectra of  $\text{Ni(OH)}_2$  and  $\text{Ni(OH)}_2@MXene$ , respectively.

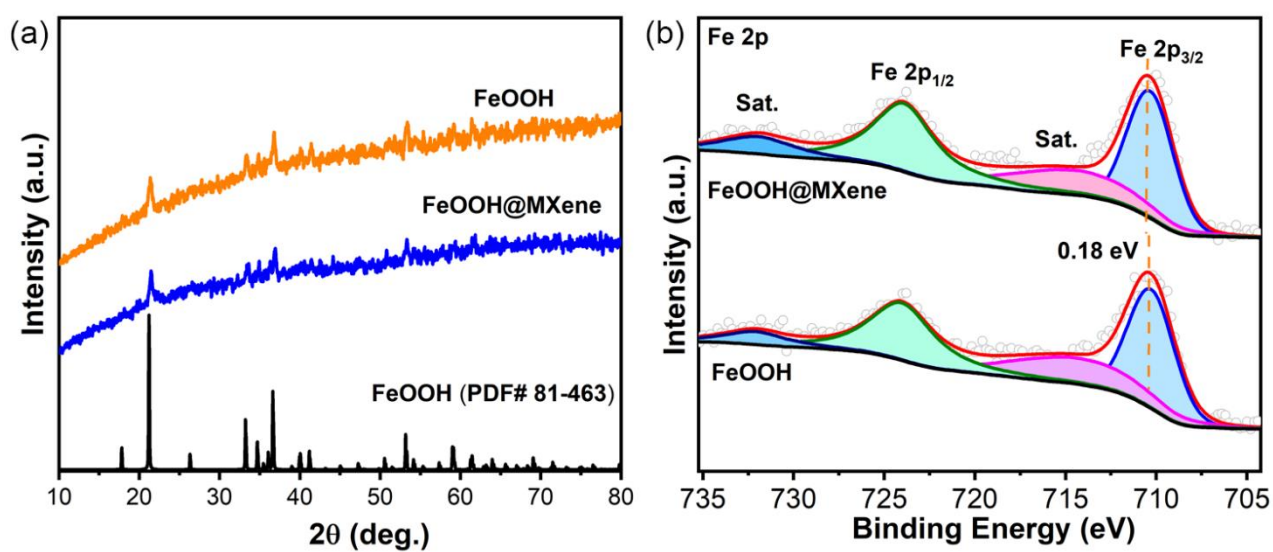

**Fig.S8.** (a) XRD and (b) XPS spectra of FeOOH and FeOOH@MXene, respectively.

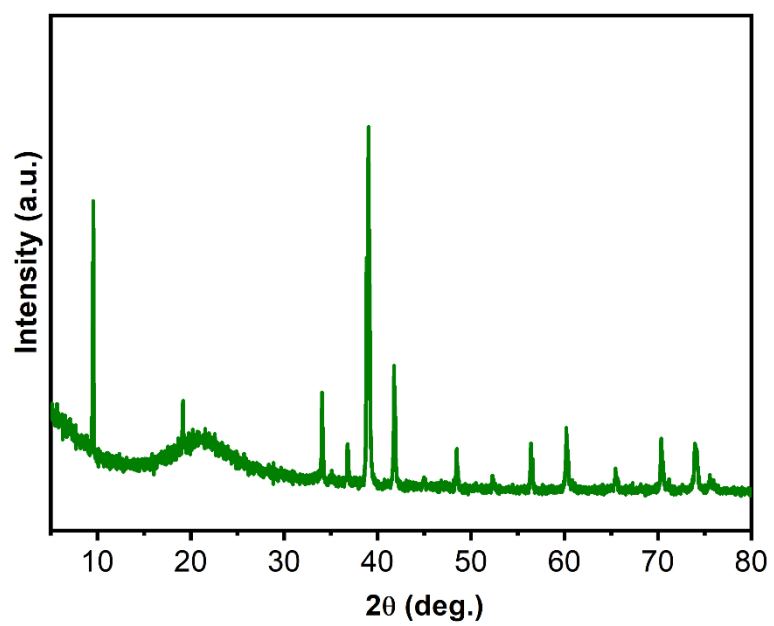

**Fig.S9.** XRD pattern of Ti<sub>3</sub>AlC<sub>2</sub>.

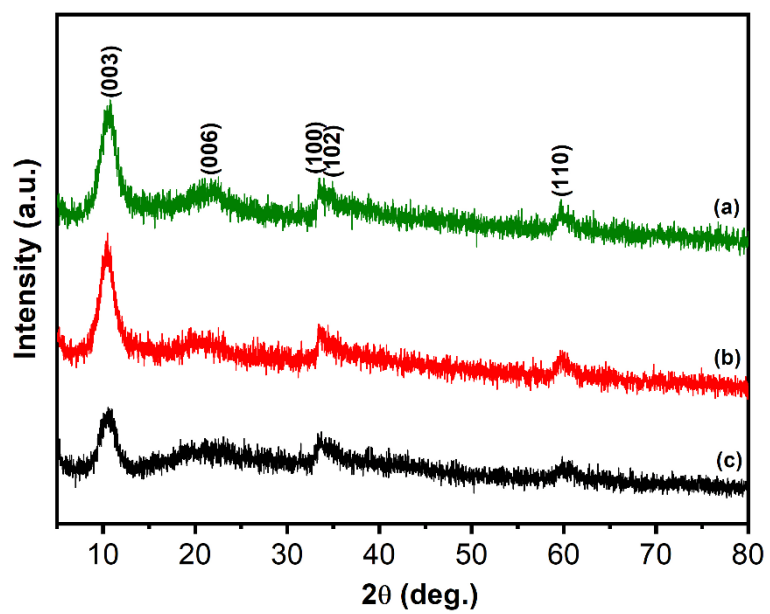

**Fig.S10.** XRD patterns of Co(OH)<sub>2</sub>@MXene with different ratios (a) Co(OH)<sub>2</sub>@1MXene, (b) Co(OH)<sub>2</sub>@5MXene, and (c) Co(OH)<sub>2</sub>@25MXene.

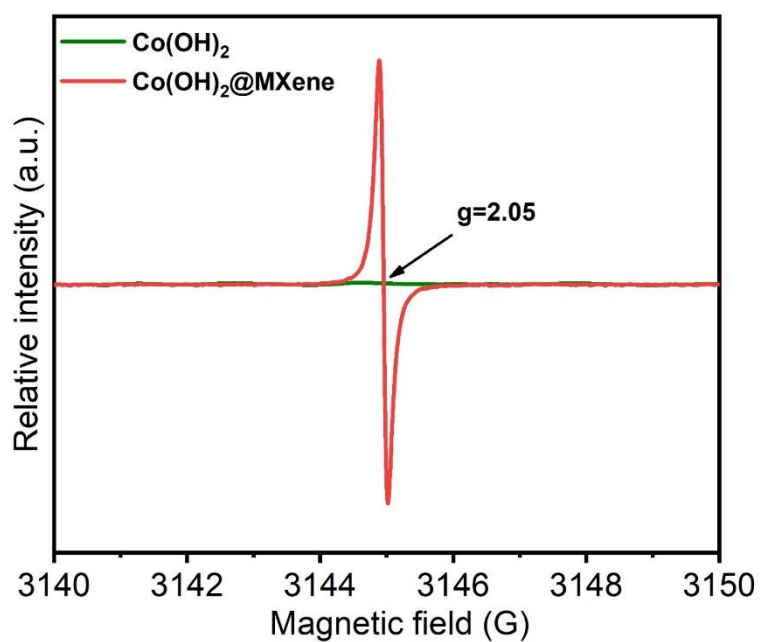

**Fig.S11.** EPR spectra of  $\text{Co(OH)}_2@MXene$  and  $\text{Co(OH)}_2$ .

EPR spectra were recorded to provide fingerprint evidence due to its sensitivity to unpaired electrons trapped by oxygen vacancies. A strong signal intensity at  $g = 2.05$  was observed for  $\text{Co(OH)}_2@MXene$ , while  $\text{Co(OH)}_2$  has a very weak signal, revealing a much higher concentration of oxygen vacancies in  $\text{Co(OH)}_2@MXene$ .

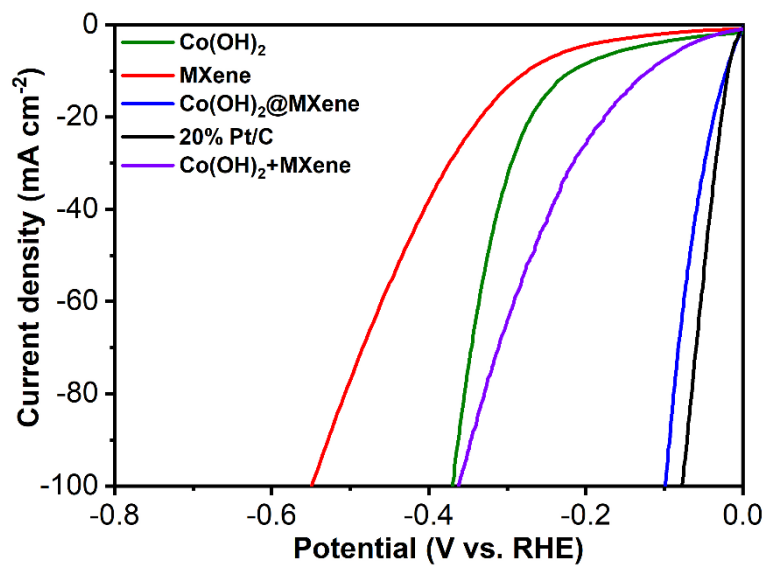

**Fig.S12.** HER Polarization curves of Co(OH)<sub>2</sub>, MXene, Co(OH)<sub>2</sub>@MXene, 20% Pt/C, and physical mixture (Co(OH)<sub>2</sub>+MXene).

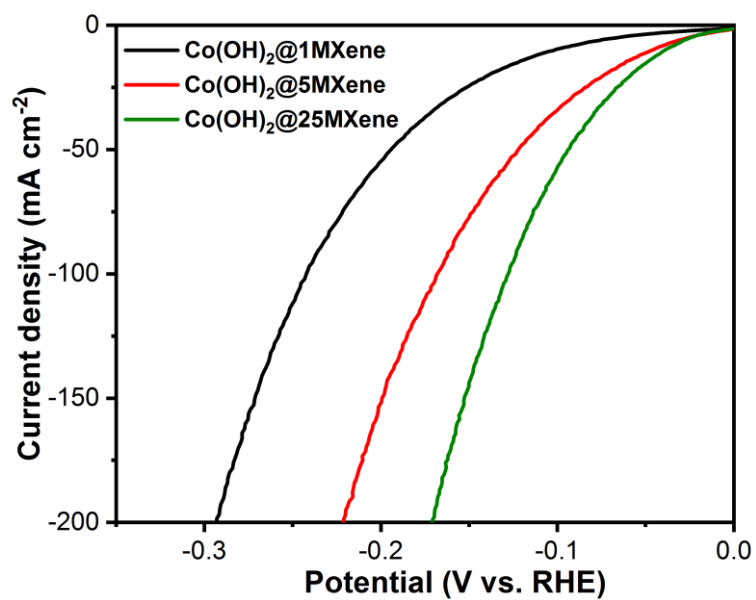

**Fig.S13.** HER Polarization curves of (a) Co(OH)<sub>2</sub>@1MXene, (b) Co(OH)<sub>2</sub>@5MXene, and (c) Co(OH)<sub>2</sub>@25MXene.



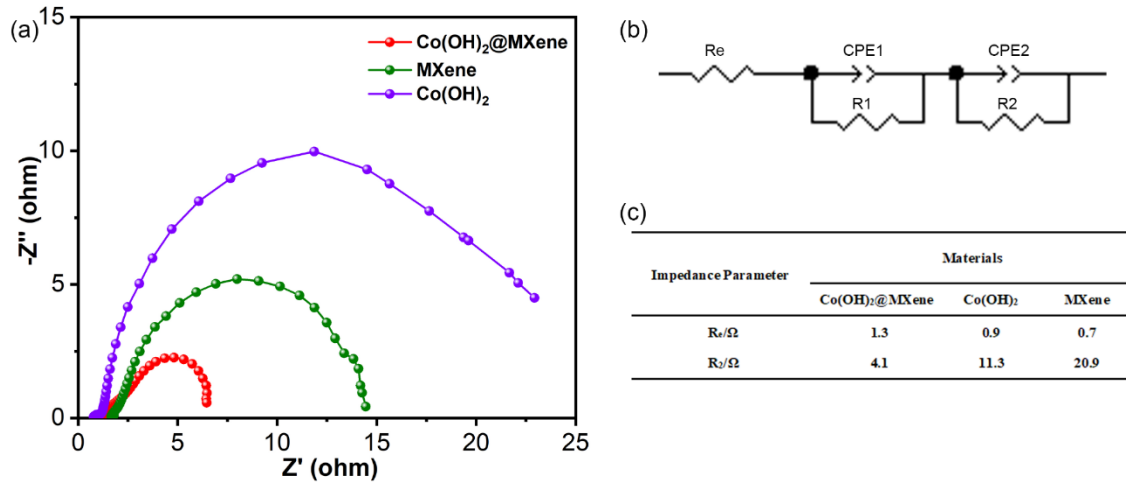

**Fig.S14.** (a) Nyquist plots of  $\text{Co(OH)}_2$ , MXene,  $\text{Co(OH)}_2$ @MXene, respectively; (b) equivalent circuit model used to fit the experimental impedance spectra; (c) corresponding fitted impedance data obtained from Nyquist plots using the circuit in (b).

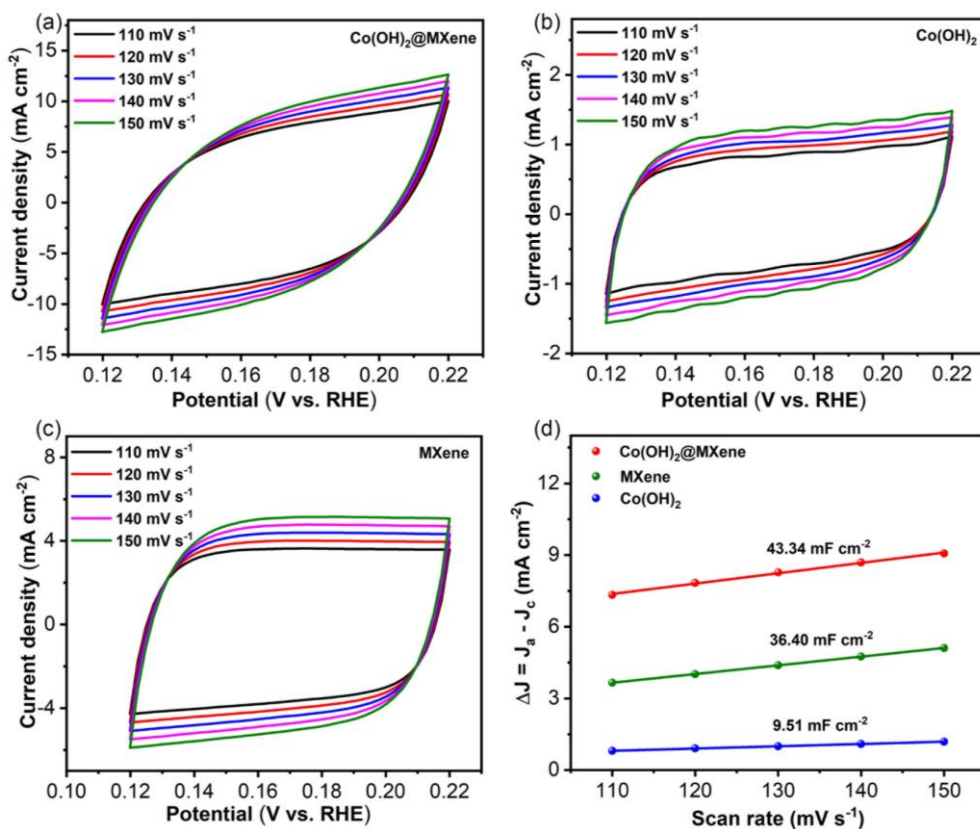

**Fig.S15.** (a-c) CV of Co(OH)<sub>2</sub>@MXene, Co(OH)<sub>2</sub>, and MXene at different scan rates in the voltage range of 0.12 to 0.22 V, respectively; (d) Double-layer capacitance ( $C_{dl}$ ) of Co(OH)<sub>2</sub>, MXene, Co(OH)<sub>2</sub>@MXene (where  $\Delta J$  is the difference between anodic and cathodic current densities in CV curves at different scan rates in a non-Faradaic region).

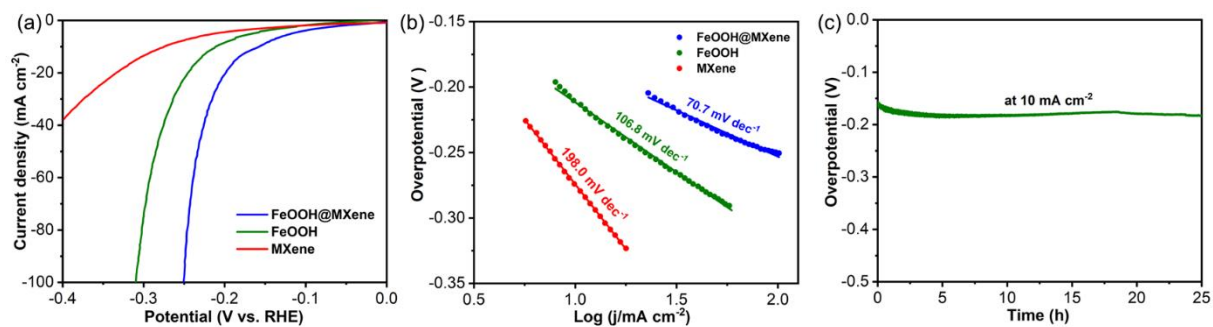

**Fig.S16.** (a) the HER Polarization curves; (b) corresponding Tafel plots of FeOOH, MXene, FeOOH@MXene in 1 M KOH; (c) long-term stability of FeOOH@MXene at current density of  $-10 \text{ mA cm}^{-2}$ .

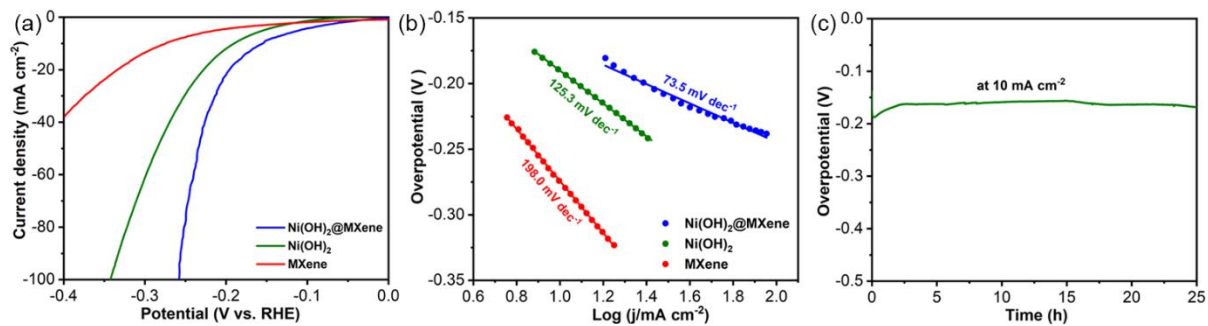

**Fig.S17.** (a) the HER Polarization curves; (b) corresponding Tafel plots of Ni(OH)<sub>2</sub>, MXene, Ni(OH)<sub>2</sub>@MXene in 1 M KOH; (c) long-term stability of Ni(OH)<sub>2</sub>@MXene at current density of -10 mA cm<sup>-2</sup>.

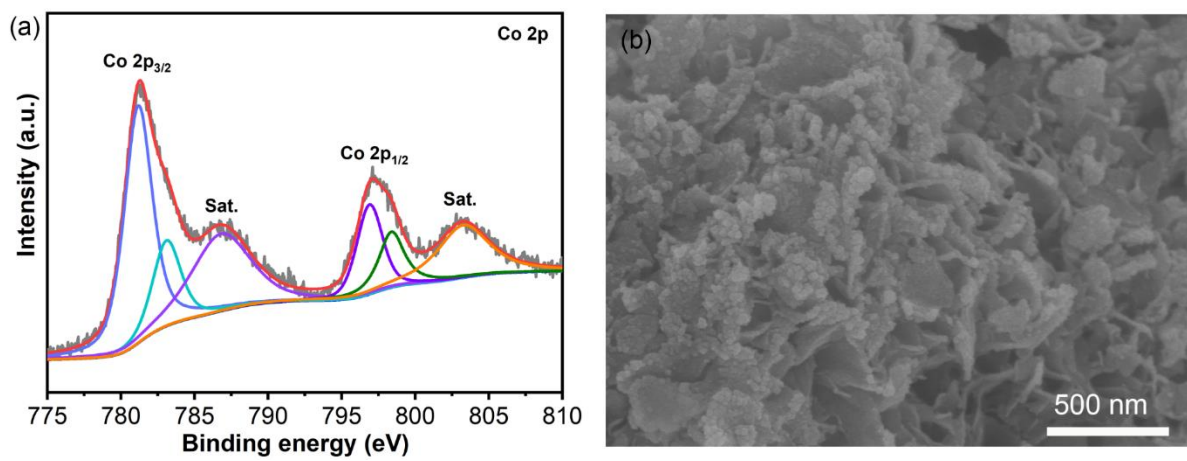

**Fig.S18.** (a) XPS spectra of Co2p and (b) SEM image of Co(OH)<sub>2</sub>@MXene after HER cycling.

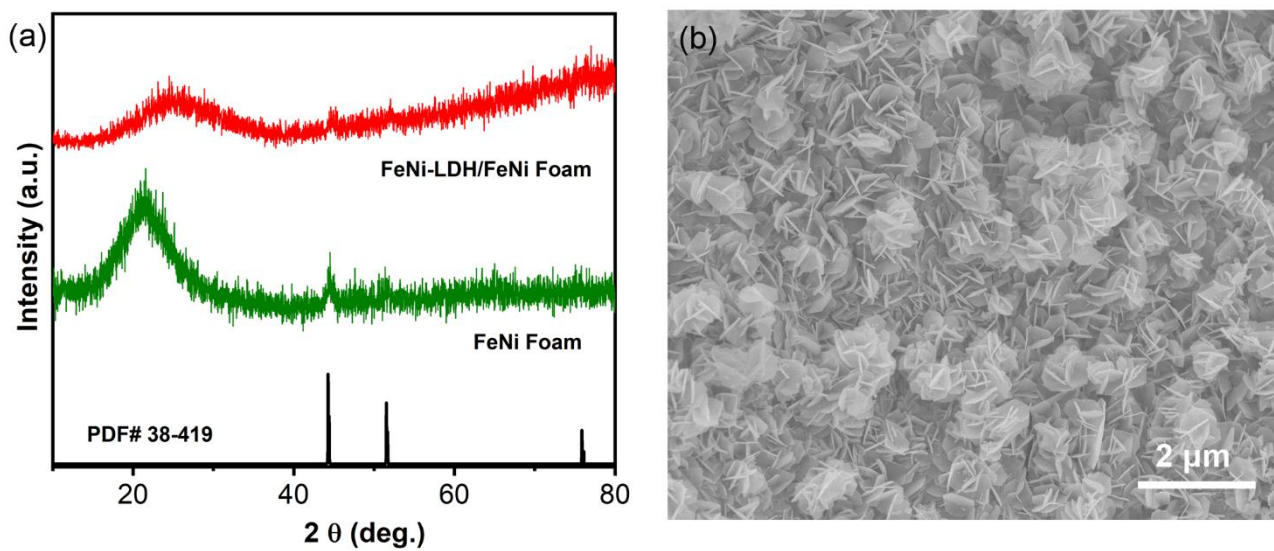

**Fig.S19.** (a) XRD and (b) SEM images of as-prepared FeNi-LDH.

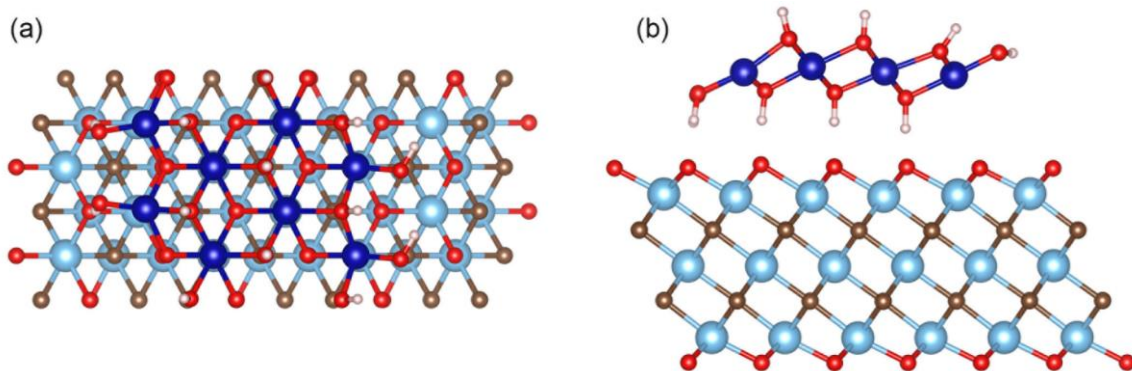

**Fig.S20.** (a) Top view and (b) side view structures of Co(OH)<sub>2</sub>@MXene.

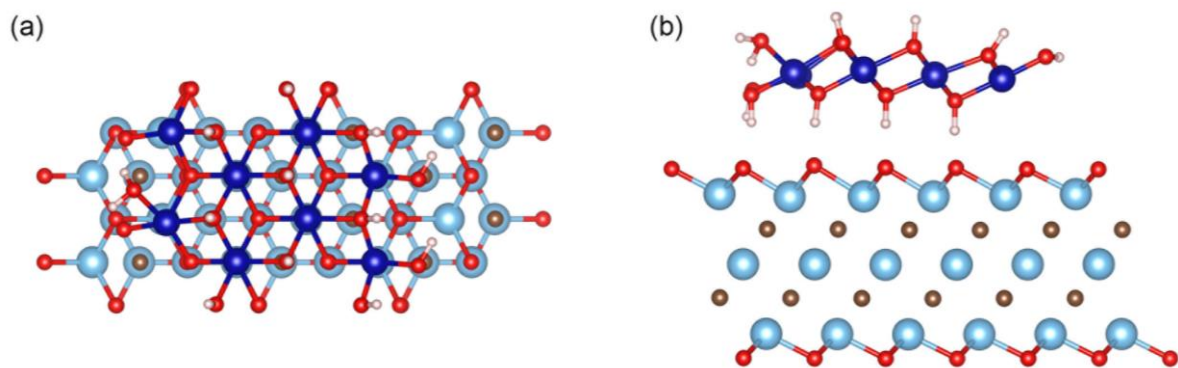

**Fig.S21.** (a) Top view and (b) side view structures of H<sub>2</sub>O\* adsorption on Co(OH)<sub>2</sub>@MXene initially, respectively.



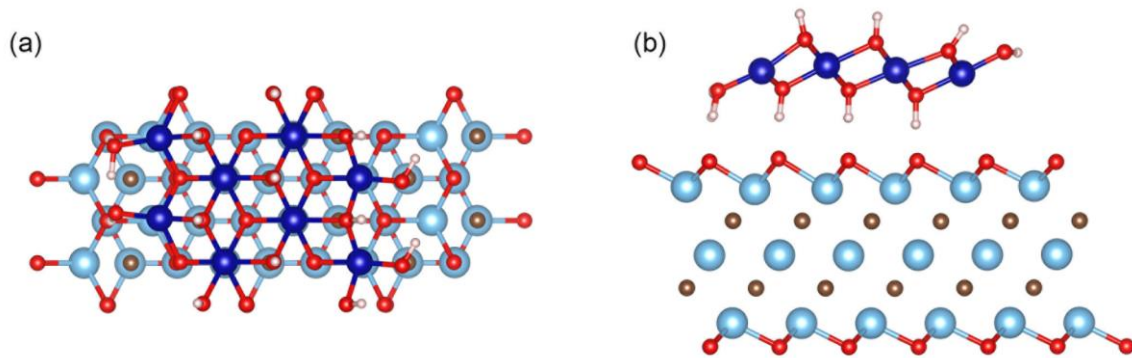

**Fig.S22.** (a) Top view and (b) side view structures of H<sup>+</sup> adsorption on Co(OH)<sub>2</sub>@MXene initially, respectively.

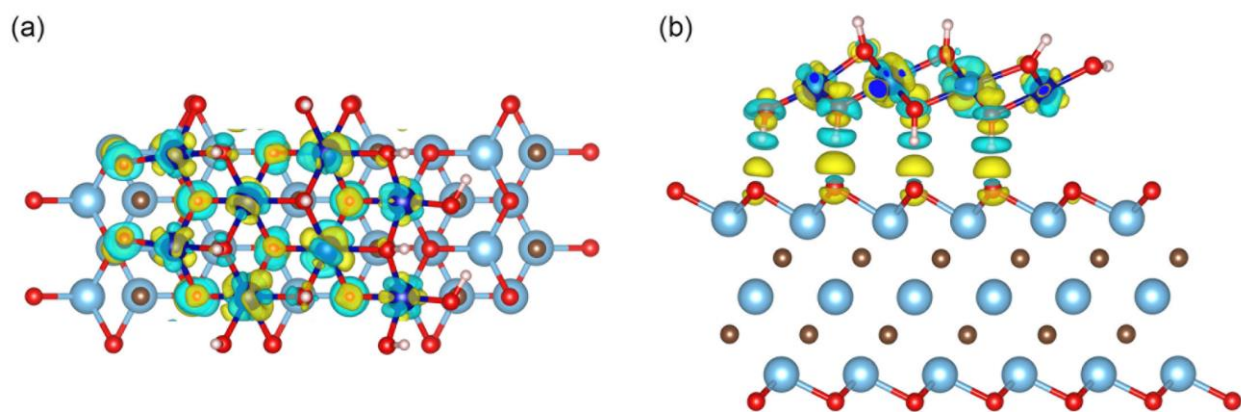

**Fig.S23.** (a) Top view and (b) side view of calculated charge density distribution differences of Co(OH)<sub>2</sub>@MXene structures, respectively.

**Table S1.** CoK-edge EXAFS fitting of Co(OH)<sub>2</sub> and Co(OH)<sub>2</sub>@MXene.

R is the bond distance; CN is coordination number;  $\sigma^2$  is the Debye-Waller factor; E0 is adjustable “muffin-tin zero”.

| Sample                     | Path  | CN  | R(Å)  | $\sigma^2(\text{Å}^{-2})$ | E0(eV) |
|----------------------------|-------|-----|-------|---------------------------|--------|
| Co(OH) <sub>2</sub>        | Co-O  | 5.6 | 2.061 | 0.0179                    | -0.284 |
|                            | Co-Co | 6.0 | 3.097 | 0.0098                    | -0.284 |
| Co(OH) <sub>2</sub> @MXene | Co-O  | 5.9 | 2.069 | 0.0171                    | -0.422 |
|                            | Co-Co | 5.7 | 3.107 | 0.0105                    | -0.422 |

**Table S2.** Comparison of HER activity measured for Co(OH)<sub>2</sub>@MXene with other representative reported HER oxides-based catalysts using 1.0 M KOH as electrolyte.

| Sample                                                              | Loading amount (mg cm <sup>-2</sup> ) | Current density (mA cm <sup>-2</sup> ) | Overpotential (mV) | Tafel slope (mV dec <sup>-1</sup> ) | References                            |
|---------------------------------------------------------------------|---------------------------------------|----------------------------------------|--------------------|-------------------------------------|---------------------------------------|
| <b>Co(OH)<sub>2</sub>@MXene</b>                                     | <b>1</b>                              | <b>10</b>                              | <b>21</b>          | <b>31.7</b>                         | <b>This work</b>                      |
| C doped NiO/Nickel foam                                             | N.A.                                  | 10                                     | 27                 | 36                                  | Nat. Commun. 2020, 11, 1853.          |
| Ni(OH) <sub>2</sub> /NiMoO <sub>x</sub>                             | 1                                     | 10                                     | 36                 | 38                                  | Adv. Energy Mater. 2019, 9, 1902703.  |
| Ni <sub>11</sub> (HPO <sub>3</sub> ) <sub>8</sub> (OH) <sub>6</sub> | 3                                     | 10                                     | 42                 | 102                                 | Energy Environ. Sci. 2018, 11, 1287.  |
| SrTi <sub>0.7</sub> Ru <sub>0.3</sub> O <sub>3-δ</sub>              | 0.232                                 | 10                                     | 46                 | 40                                  | Nat. Commun. 2020, 11, 5657.          |
| Ni-FeNP (Ni/γ-Fe <sub>2</sub> O <sub>3</sub> )                      | 2.5                                   | 10                                     | 46                 | 58                                  | Nat. Commun. 2019, 10, 5599.          |
| IFNOFs-45(FeF <sub>2</sub> /Fe <sub>2</sub> O <sub>3</sub> )        | 0.2                                   | 10                                     | 47                 | 31                                  | Nat. Commun. 2018, 9, 1809.           |
| Ni, Zn dual doped CoO NRs                                           | 0.486                                 | 10                                     | 53                 | 47                                  | Adv. Mater. 2019, 31, 1807771.        |
| Fe-CoO NWs                                                          | 0.248                                 | 10                                     | 53                 | 65                                  | J. Mater. Chem. A 2020, 8, 10831.     |
| 1T-MoS <sub>2</sub> QS/Ni(OH) <sub>2</sub>                          | 0.16                                  | 10                                     | 57                 | 30                                  | Adv. Funct. Mater. 2020, 30, 2000551. |
| DSO NiFe LDH                                                        | N.A.                                  | 10                                     | 59                 | 62                                  | Energy Environ. Sci. 2019, 12, 572.   |
| MoO <sub>3</sub> /Ni–NiO/Carbon cloth                               | N.A.                                  | 10                                     | 62                 | 59                                  | Adv. Mater. 2020, 32, 2003414.        |
| ex-MoSe <sub>2</sub> :NiCl <sub>2</sub> /4-SWCNTs                   | 0.8                                   | 10                                     | 64                 | 114                                 | Adv. Energy Mater. 2018, 8, 1801764.  |
| NiFeO <sub>x</sub> @NiCu                                            | 1                                     | 10                                     | 66                 | 67.8                                | Adv. Mater. 2019, 31, 1806769.        |
| V-CoP/a-CeO <sub>2</sub>                                            | 0.8                                   | 10                                     | 68                 | 48                                  | Adv. Funct. Mater. 2020, 30, 1909618. |
| Co-doped CeO <sub>2</sub> NSs                                       | 4.2                                   | 10                                     | 70                 | N.A.                                | J. Am. Chem. Soc. 2020, 142, 6461.    |
| CoMnO@CN superlattices                                              | 2                                     | 20                                     | 71                 | 97                                  | J. Am. Chem. Soc. 2015, 137, 14305.   |
| Strained-CoO NRs                                                    | 0.48                                  | 10                                     | 73                 | 82                                  | Nat. Commun. 2017, 8, 1509.           |
| MoS <sub>2</sub> /Ni(OH) <sub>2</sub>                               | 4.8                                   | 10                                     | 80                 | 60                                  | Nano Energy 2017, 37, 74.             |
| Co <sub>3</sub> (OH) <sub>2</sub> (HPO <sub>4</sub> ) <sub>2</sub>  | 2                                     | 10                                     | 87                 | 97                                  | Adv. Funct. Mater. 2019, 29, 1808632. |
| Se–(NiCo) <sub>S<sub>x</sub></sub> /(OH) <sub>x</sub>               | N.A.                                  | 10                                     | 87                 | 103                                 | Adv. Mater. 2018, 30, 1705538.        |
| CoFeO@ black phosphorus                                             | 0.36                                  | 10                                     | 88                 | 51                                  | Angew.Chem.Int. Ed. 2020, 9, 21106.   |

|                                                                                        |       |    |     |       |                                             |
|----------------------------------------------------------------------------------------|-------|----|-----|-------|---------------------------------------------|
| MoS <sub>2</sub> @Co(OH) <sub>2</sub>                                                  | 0.2   | 10 | 89  | 53    | ACS Nano, 2018, 12, 4595.                   |
| VOOH-3Fe                                                                               | 0.2   | 10 | 90  | 38    | Small 2019, 15, 1904688.                    |
| P-doped CoMoO <sub>4</sub>                                                             | N.A.  | 10 | 94  | 93    | Adv. Sci. 2020, 7, 1903674.                 |
| CuS/Ni(OH) <sub>2</sub>                                                                | 0.286 | 10 | 95  | 104   | Nano Energy 2018, 44, 7-14.                 |
| NiCo <sub>2</sub> O <sub>4</sub> hollow microbuboids                                   | 1     | 10 | 100 | 50    | Angew. Chem. Int. Ed. 2016, 55, 6290.       |
| MoO <sub>2</sub> -FeP                                                                  | 1.9   | 10 | 103 | 48    | Adv. Mater. 2020, 32, 2000455.              |
| CoFeZr oxide/NF                                                                        | N.A.  | 10 | 104 | 119.3 | Adv. Mater. 2019, 31, 1901439.              |
| SCFP film                                                                              | 0.034 | 10 | 110 | 94    | Adv. Mater. 2018, 30, 1804333.              |
| NiFe LDH-NS@DG10                                                                       | 2     | 20 | 115 | 52    | Adv. Mater. 2017, 29, 1700017.              |
| N-doped NiCo <sub>2</sub> O <sub>4</sub>                                               | ~3.1  | 10 | 116 | 71    | J. Mater. Chem. A, 2019, 7, 1468.           |
| P-Co <sub>3</sub> O <sub>4</sub>                                                       | 0.4   | 10 | 120 | 52    | Energy & Environ. Sci. 2017, 10, 2563.      |
| Ni-Laser (Ni/NiO)                                                                      | N.A.  | 10 | 121 | 88    | Nano Energy 2017, 35, 207.                  |
| 2D MoS <sub>2</sub> @Co(OH) <sub>2</sub>                                               | 0.285 | 10 | 125 | 76    | Adv. Mater. 2018, 30, 1801171.              |
| R-NCO                                                                                  | 2.5   | 10 | 135 | 52    | J. Am. Chem. Soc. 2018, 140, 13644.         |
| S-CoO <sub>x</sub>                                                                     | 2.1   | 10 | 136 | 80    | Nano Energy 2020, 71, 104652.               |
| Ni <sub>3</sub> S <sub>2</sub> /NiWO <sub>4</sub>                                      | 5     | 10 | 136 | 112   | Appl. Catal. B 2020, 274, 119120            |
| PA-NiO/NF                                                                              | N.A.  | 10 | 138 | 34    | ACS Energy Lett. 2018, 3, 892.              |
| <i>m</i> MoO <sub>3</sub>                                                              | 0.2   | 10 | 138 | 56    | Adv. Energy Mater. 2016, 6, 1600528.        |
| CuCoO-NWs                                                                              | 1.2   | 10 | 140 | 108   | Adv. Funct. Mater. 2016, 26, 8555.          |
| Co <sub>3</sub> O <sub>4</sub> -MTA                                                    | N.A.  | 10 | 158 | 98    | Angew. Chem. Int. Ed. 2017, 56, 1324.       |
| MoS <sub>2</sub> /Co <sub>3</sub> O <sub>4</sub>                                       | 2     | 10 | 205 | 98    | Appl. Catal. B: Environ. 2019, 248, 202.    |
| A-PBCCF-H                                                                              | N.A.  | 10 | 224 | 42    | Nano Energy 2017, 32, 247.                  |
| Co <sup>II</sup> Fe-ONC                                                                | 1     | 10 | 240 | 76    | Appl. Catal. B: Environ. 2019, 258, 117968. |
| LiCo(H <sub>2</sub> O) <sub>2</sub> [BP <sub>2</sub> O <sub>8</sub> ]·H <sub>2</sub> O | 1     | 10 | 245 | N.A.  | Energy Environ. Sci. 2019, 12, 988.         |

|                                      |       |    |     |     |                                          |
|--------------------------------------|-------|----|-----|-----|------------------------------------------|
| CoO <sub>x</sub> @CN                 | 0.12  | 10 | 260 | 115 | J. Am. Chem. Soc.<br>2015, 137, 2688.    |
| Co <sub>3</sub> O <sub>4</sub> /C-QA | 0.295 | 10 | 280 | 57  | Adv. Funct. Mater.<br>2020, 30, 2000024. |
| 2D ZnCo <sub>2</sub> O <sub>4</sub>  | 0.28  | 10 | 335 | 43  | Small 2019, 15,<br>1904587.              |

**Table S3.** Comparison of overall water splitting performance in 1.0 M KOH for Co(OH)<sub>2</sub>@MXene with other oxide-based electrocatalysts.

| Sample                                                                                  | Current density (mA cm <sup>-2</sup> ) | Potential (V) | References                            |
|-----------------------------------------------------------------------------------------|----------------------------------------|---------------|---------------------------------------|
| <b>Co(OH)<sub>2</sub>@MXene  NiFe-LDH</b>                                               | <b>10</b>                              | <b>1.46</b>   | <b>This work</b>                      |
| Ni-FeNP (Ni/γ-Fe <sub>2</sub> O <sub>3</sub> )                                          | 10                                     | 1.47          | Nat. Commun. 2019, 10, 5599.          |
| DSO NiFe LDH                                                                            | 10                                     | 1.48          | Energy Environ. Sci. 2019, 12, 572.   |
| MoO <sub>2</sub> -FeP                                                                   | 10                                     | 1.49          | Adv. Mater. 2020, 32, 2000455.        |
| MoO <sub>2</sub> /NF                                                                    | 10                                     | 1.52          | Adv. Mater. 2016, 28, 3785.           |
| LiCo(H <sub>2</sub> O) <sub>2</sub> [BP <sub>2</sub> O <sub>8</sub> ] •H <sub>2</sub> O | 10                                     | 1.53          | Energy Environ. Sci. 2019, 12, 988.   |
| Fe-CoO NWs                                                                              | 10                                     | 1.53          | J. Mater. Chem. A 2020, 8, 10831.     |
| VOOH-0Fe                                                                                | 10                                     | 1.53          | Small 2019, 15, 1904688.              |
| RuO <sub>2</sub>   NiFeOx@NiCu                                                          | 10                                     | 1.54          | Adv. Mater. 2019, 31, 1806769.        |
| Co <sub>3</sub> (OH) <sub>2</sub> (HPO <sub>4</sub> ) <sub>2</sub>                      | 10                                     | 1.54          | Adv. Funct. Mater. 2019, 29, 1808632. |
| CoO <sub>x</sub> @CN                                                                    | 20                                     | 1.55          | J. Am. Chem. Soc. 2015, 137, 2688.    |
| PA-NiO                                                                                  | 10                                     | 1.56          | ACS Energy Lett. 2018, 3, 892.        |
| V-CoP/a-CeO <sub>2</sub>                                                                | 10                                     | 1.56          | Adv. Funct. Mater. 2020, 30, 1909618. |
| 3D iron fluoride-oxide film                                                             | 10                                     | 1.58          | Nat. Commun. 2018, 9, 1809.           |
| Ni/Ni(OH) <sub>2</sub>                                                                  | 10                                     | 1.59          | Adv. Mater. 2020, 32, 1906915.        |
| 3D Se-(NiCo)S <sub>x</sub> /(OH) <sub>x</sub>                                           | 10                                     | 1.6           | Adv. Mater. 2018, 30, 1705538.        |
| CuCoO-NWs                                                                               | 10                                     | 1.61          | Adv. Funct. Mater. 2016, 26, 8555.    |
| R-NCO                                                                                   | 10                                     | 1.61          | J. Am. Chem. Soc. 2018, 140, 13644.   |
| δ-FeOOH                                                                                 | 10                                     | 1.61          | Adv. Mater. 2018, 30, 1803144.        |
| A-PBCCF-H                                                                               | 10                                     | 1.62          | Nano Energy 2017, 32, 247.            |
| Ni <sub>11</sub> (HPO <sub>3</sub> ) <sub>8</sub> (OH) <sub>6</sub>                     | 10                                     | 1.62          | Energy Environ. Sci. 2018, 11, 1287.  |
| CoFeZr oxide/NF                                                                         | 10                                     | 1.63          | Adv. Mater. 2019, 31, 1901439.        |
| Co <sub>3</sub> O <sub>4</sub> nanorods                                                 | 10                                     | 1.63          | Angew. Chem. Int. Ed. 2017, 56, 1324. |
| CoFeZr oxides/NF                                                                        | 10                                     | 1.63          | Adv. Mater. 2019, 31, 1901439.        |

|                                            |    |      |                                             |
|--------------------------------------------|----|------|---------------------------------------------|
| S-CoO <sub>x</sub>                         | 10 | 1.63 | Nano Energy 2020, 71, 104652.               |
| Ni-Fe-O                                    | 10 | 1.64 | Adv. Energy Mater. 2018, 8, 1701347.        |
| S-NiFe <sub>2</sub> O <sub>4</sub> /NF     | 10 | 1.65 | Nano Energy, 2017, 40, 264.                 |
| Ni(OH) <sub>2</sub> /NiMoO <sub>x</sub>    | 10 | 1.65 | Adv. Energy Mater. 2019, 9, 1902703.        |
| Ni-Laser (Ni/NiO)                          | 10 | 1.66 | Nano Energy 2017, 35, 207.                  |
| SCFP film                                  | 10 | 1.66 | Adv. Mater. 2018, 30, 1804333.              |
| Co <sub>5</sub> Mo <sub>1.0</sub> O NSs@NF | 10 | 1.68 | Nano Energy, 2018, 45, 448.                 |
| Co <sup>II</sup> Fe-ONC                    | 10 | 1.71 | Appl. Catal. B: Environ. 2019, 258, 117968. |
| Co <sub>3</sub> O <sub>4</sub> /C-QA       | 10 | 1.71 | Adv. Funct. Mater. 2020, 30, 2000024.       |
